# Supplementary figures and images for: Determination of traits responding to iron toxicity stress at different stages and genome-wide association analysis for iron toxicity tolerance in rice (Oryza sativa L.)
Source: Frontiers journal article supplement (doi:10.3389/fpls.2022.994560), 2022-10-06

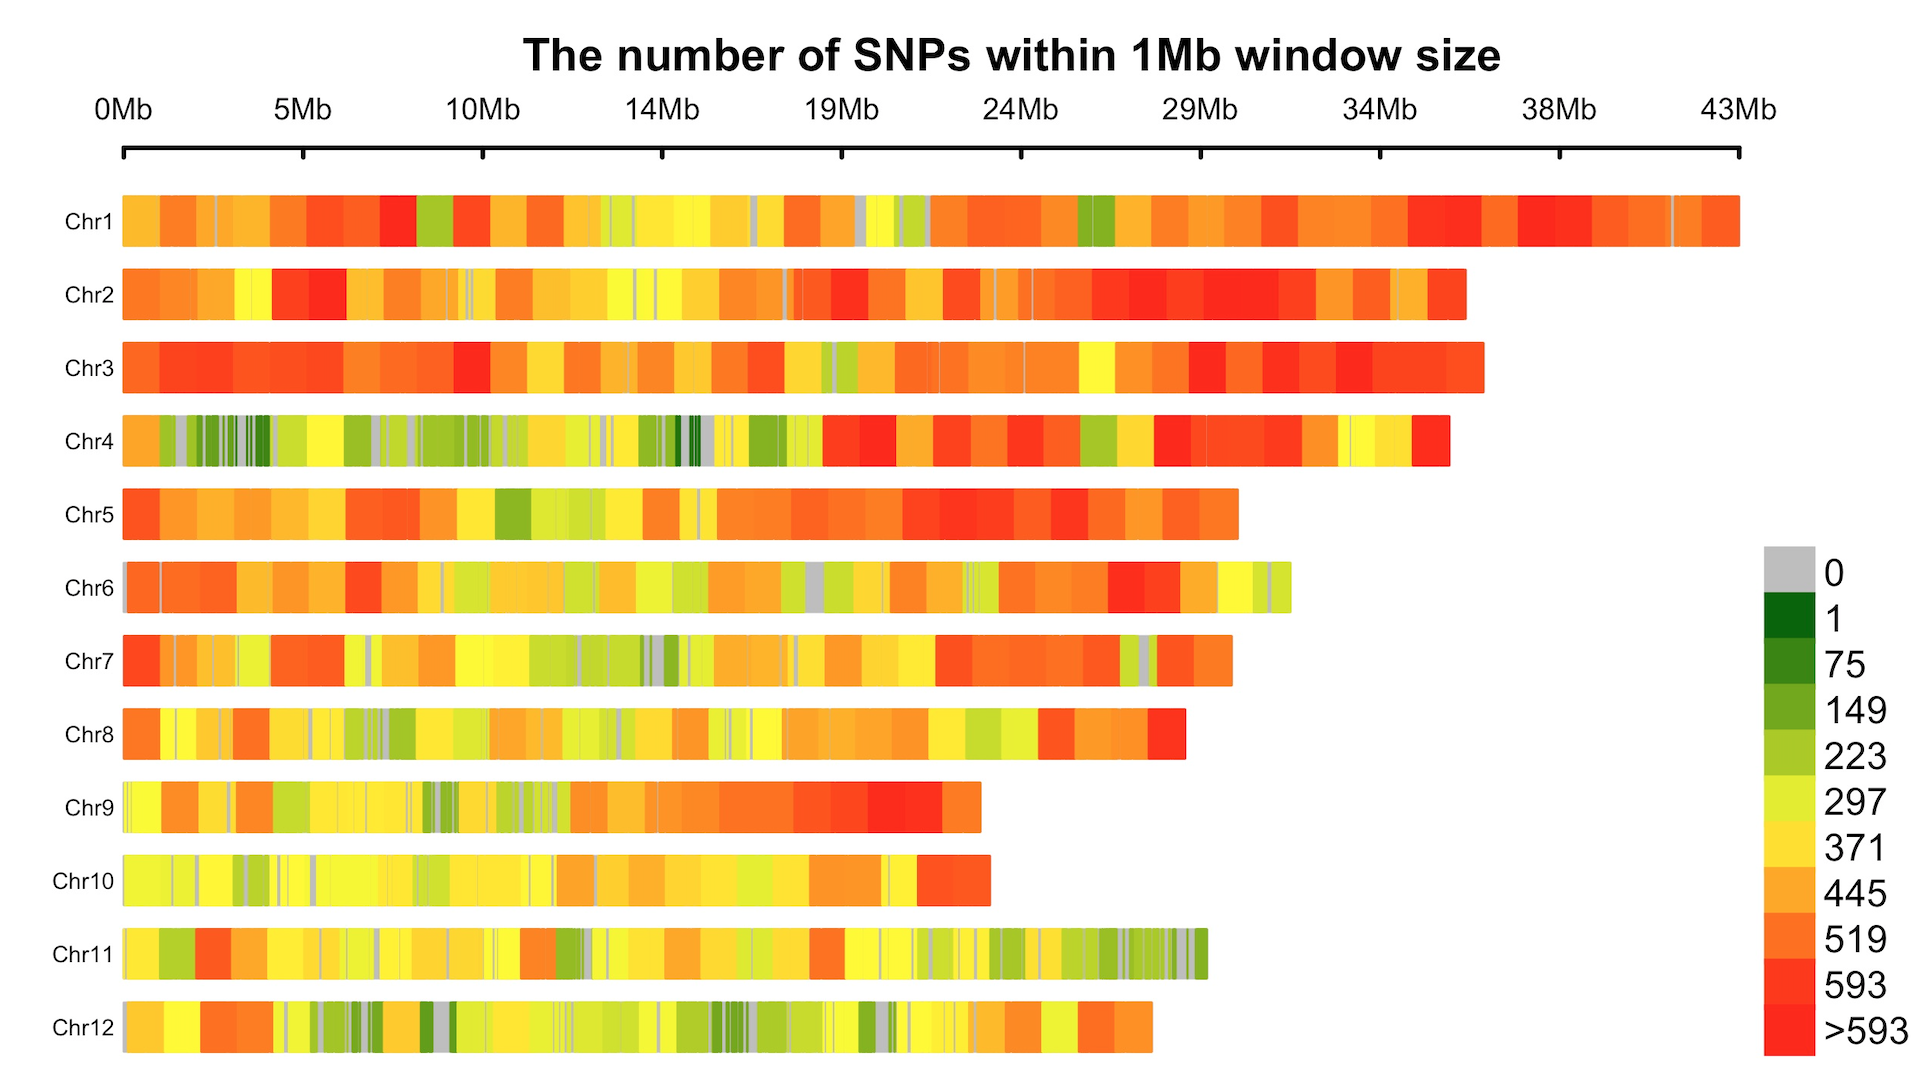


Figure S1. Density heatmap of the 160,498 SNP markers across 12 rice chromsome

Supplement: Data_Sheet_1.zip [file Data_Sheet_1.zip]
